## 6. Conclusion

While unable to meet the intended objectives of this systematic review of the AI/ML system literature on SDS from FCV aiding in the the diagnosis of COVID-19 illness, the authors did complete a gap analysis that identified the principal issues and significant challenges facing this growing field of study. The consequences of such gaps directly affected not only the quality of data available in the relevant literature but also prevented analyses to assess regulatory readiness of the devices and applications presented. Acceptance of unfamiliar technology by disaster or pandemic decision makers and clinicians would require bridging of these gaps through adherence to a clear and well-documented TPLC approach to a viable regulatory pathway.
